# Supplementary material
Source: publisher site journal article supplement (http://static.cambridge.org/content/id/urn:cambridge.org:id:article:S0899823X19001508/resource/name/S0899823X19001508supp002.docx)
Supplement: Supplementary file 1 [file S0899823X19001508supp002.docx]

**Online Supplement 1 – Code Definitions**

| **Person:** Characteristics, including the education, skills, motivation, preference, needs and knowledge/experience of the stakeholder that influences their performance. |
| --- |
| **Task:** The individual activities performed during or are associated with the infection prevention practice. |
| **Tools and Technology:** Supplies the healthcare worker uses for the IP practice, the characteristics of tools and technologies, and relevant electronic or paper media. |
| **Organization:** The larger context in which the infection prevention practice occurs, including the hospital and/or unit culture, policies and procedures, work schedules (including rounds), stocking schedules, availability of supplies, and training the staff receive. |
| **Physical Environment:** The environment in which the IP practice takes place. This includes the distance to supplies; the layout of the room; the location of supplies and facilities where the IP practice occurs; the temperature of the room; noise. |
| **Barrier:** A characteristic of a work system element or elements that *interferes with* a person’s ability to efficiently, appropriately and accurately accomplish a goal or activity (Carayon, et al. 2005). |
| **Facilitator:** A characteristic of a work system element(s) that makes it easy or easier to efficiently, appropriately and accurately accomplish a goal or activity (Carayon, et al., 2005). |

Note. IP, infection prevention
